# Supplementary material for: Influence of the cation type on the DFB lasing performance of dye-doped azobenzene-containing polyelectrolytes
Source: Royal Society of Chemistry journal article supplement (doi:10.1039/c4tc01413h), 2014-08-27
Supplement: c4tc01413h1.pdf [file c4tc01413h1.pdf]

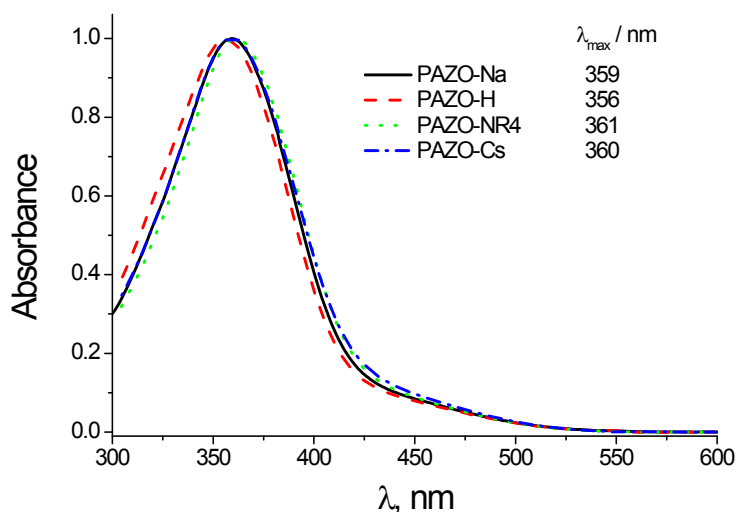

Figure S1. Absorbance spectra of the polymers solutions in methanol.

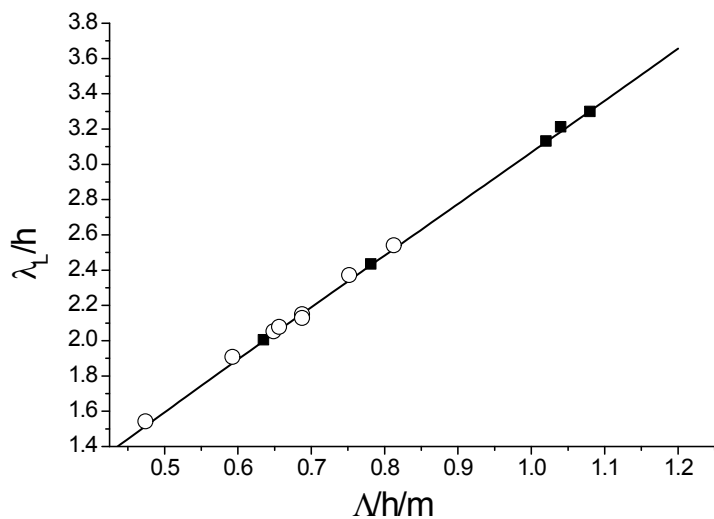

Figure S2. Dependence of normalized lasing wavelength ( $\frac{\lambda_l}{h}$ ) on normalized grating period ( $\frac{\Lambda}{m \cdot h}$ ) for DFB structures in systems containing different laser dyes in a matrix of PAZO-H; filled squares are data for the 1<sup>st</sup> order DFB structures, open circles are data for the 2<sup>nd</sup> order DFB structures, line is a fitting curve plotted using Eqs. (4)-(5) for refractive index  $n$  equal to 1.68.
